# Supplementary material for: New 10H perovskites Ba5Ln1−xMn4+yO15−δ with spin glass behaviour
Source: Royal Society of Chemistry journal article supplement (doi:10.1039/c7ra02183f), 2017-01-01
Supplement: c7ra02183f1.pdf [file c7ra02183f1.pdf]

## New 10H perovskites $\text{Ba}_5\text{Ln}_{1-x}\text{Mn}_{4+y}\text{O}_{15-\delta}$ with spin glass behaviour

Congling Yin <sup>a\*</sup>, Genfang Tian <sup>b</sup>, Guobao Li <sup>c</sup>, Fuhui Liao <sup>c</sup> and Jianhua Lin <sup>c</sup>

### Supporting Information

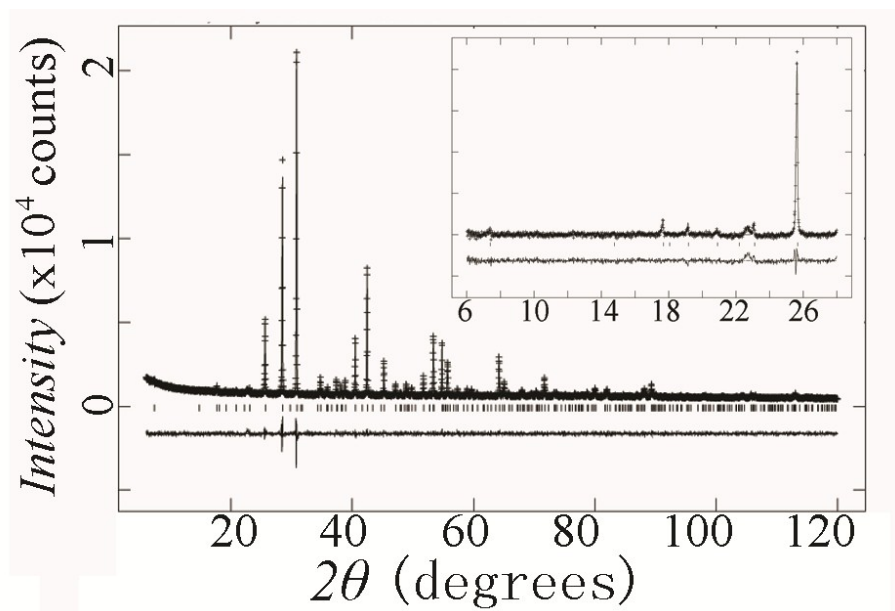

**Figure S1.** The fitted XRD plot of the  $\text{Ba}_5\text{Sm}_{0.98}\text{Mn}_{4.01}\text{O}_{15-\delta}$  sample. The inset expands the low-angle regions

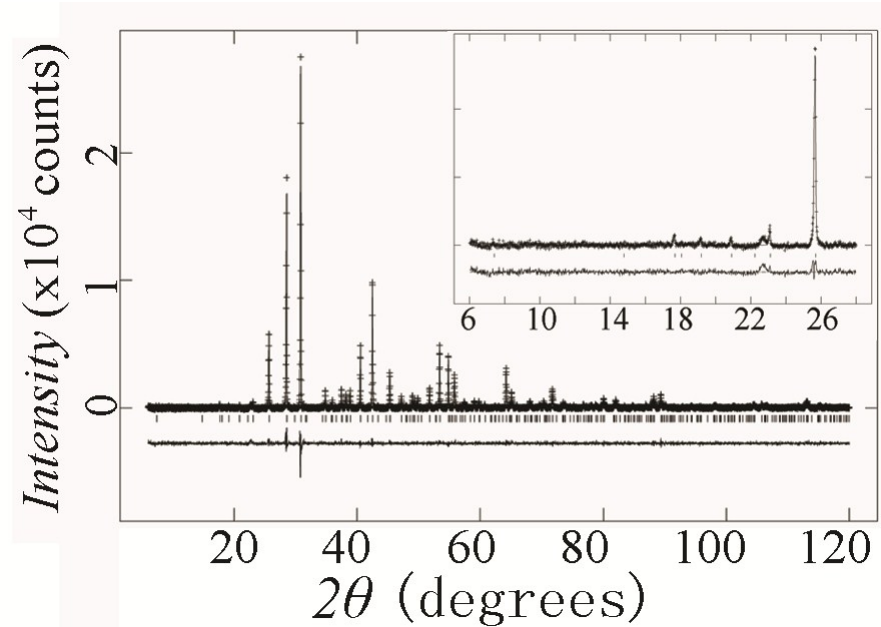

**Figure S2.** The fitted XRD plot of the  $\text{Ba}_5\text{Eu}_{0.87}\text{Mn}_{4.02}\text{O}_{15-\delta}$  sample. The inset expands the low-angle regions

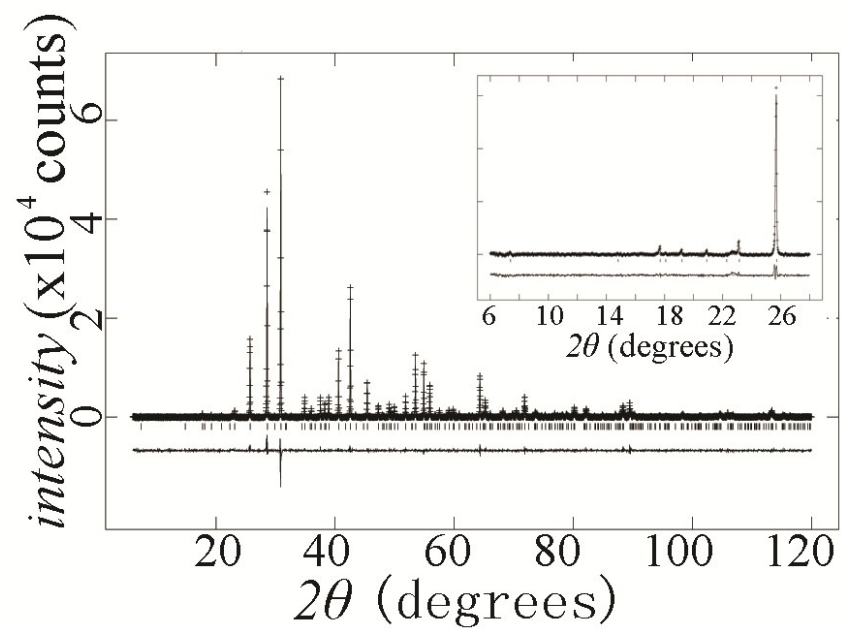

**Figure S3.** The fitted XRD plot of the  $\text{Ba}_5\text{Gd}_{0.82}\text{Mn}_{4.17}\text{O}_{15-\delta}$  sample. The inset expands the low-angle regions

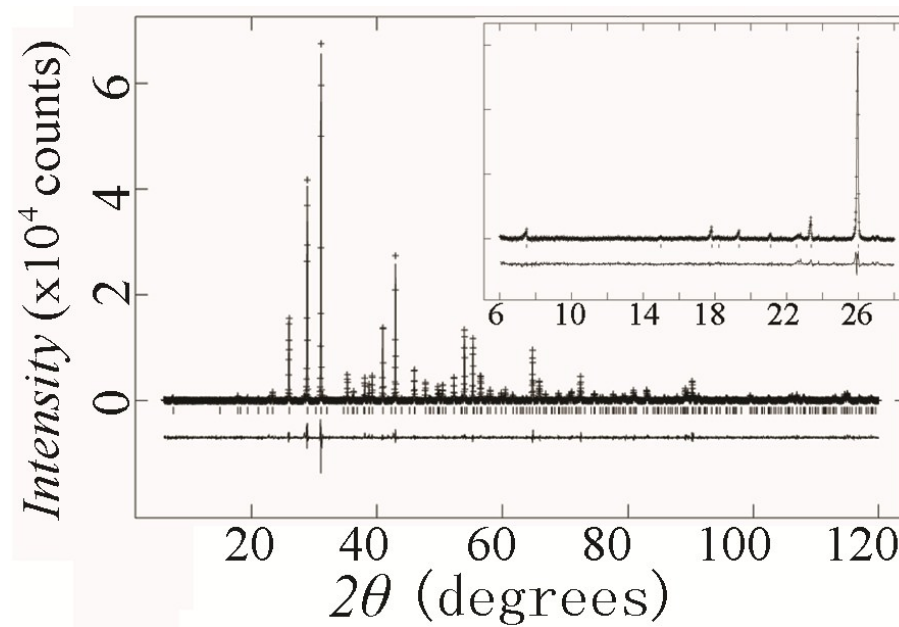

**Figure S4.** The fitted XRD plot of the  $\text{Ba}_5\text{Tb}_{0.85}\text{Mn}_{4.15}\text{O}_{15-\delta}$  sample. The inset expands the low-angle regions

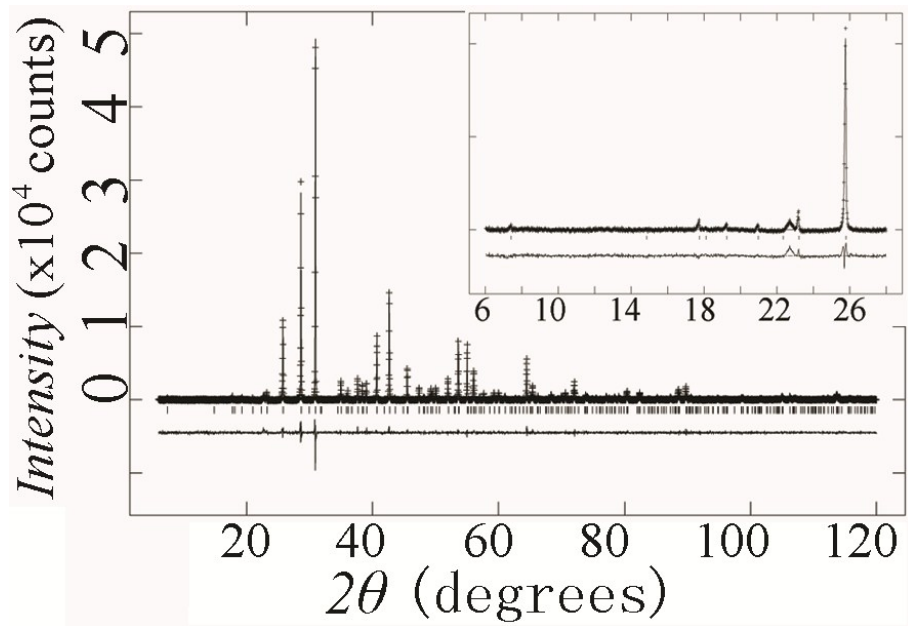

**Figure S5.** The fitted XRD plot of the  $\text{Ba}_5\text{Dy}_{0.86}\text{Mn}_{4.12}\text{O}_{15.8}$  sample. The inset expands the low-angle regions

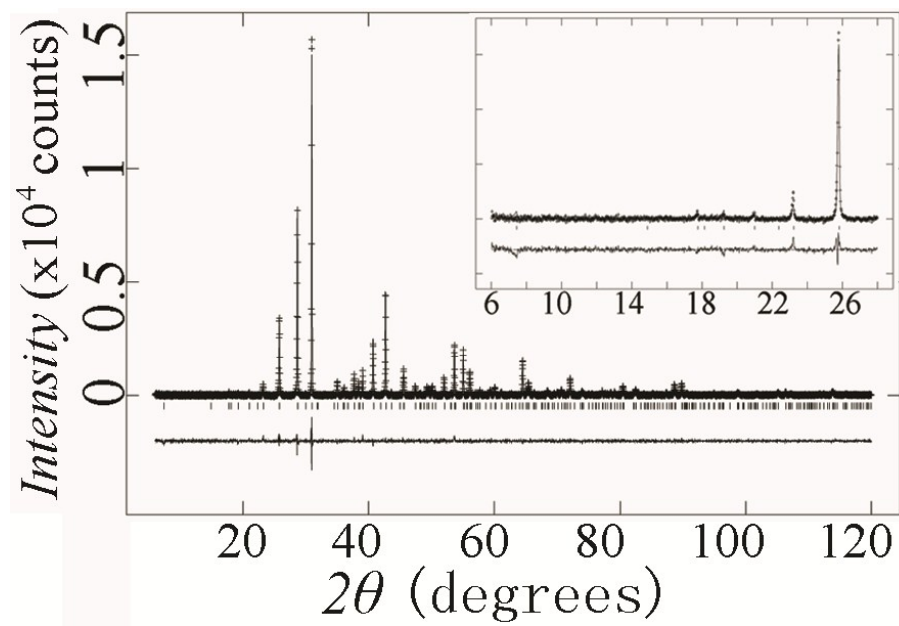

**Figure S6.** The fitted XRD plot of the  $\text{Ba}_5\text{Ho}_{0.86}\text{Mn}_{4.12}\text{O}_{15.8}$  sample. The inset expands the low-angle regions

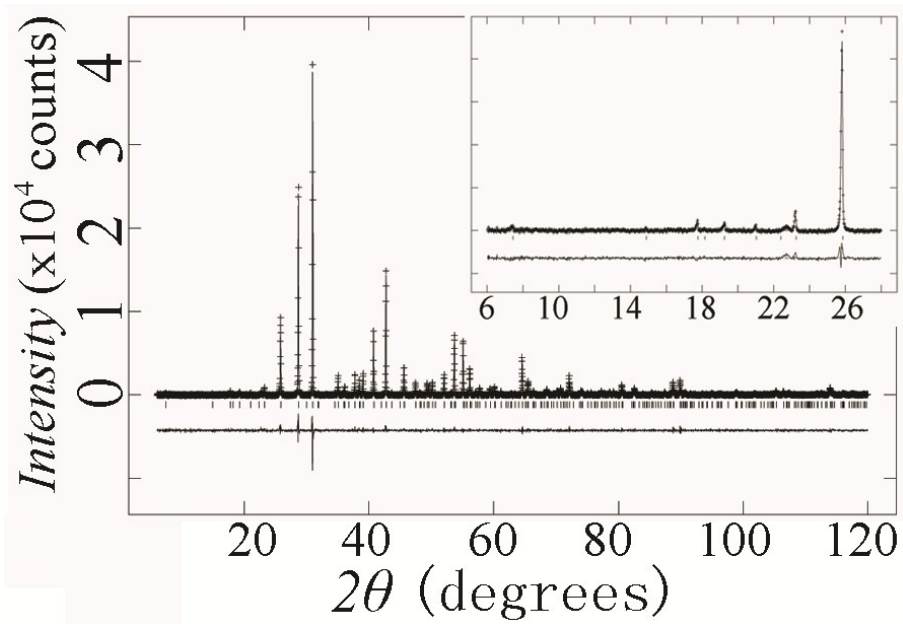

**Figure S7.** The fitted XRD plot of the  $\text{Ba}_5\text{Er}_{0.82}\text{Mn}_{4.17}\text{O}_{15-\delta}$  sample. The inset expands the low-angle regions

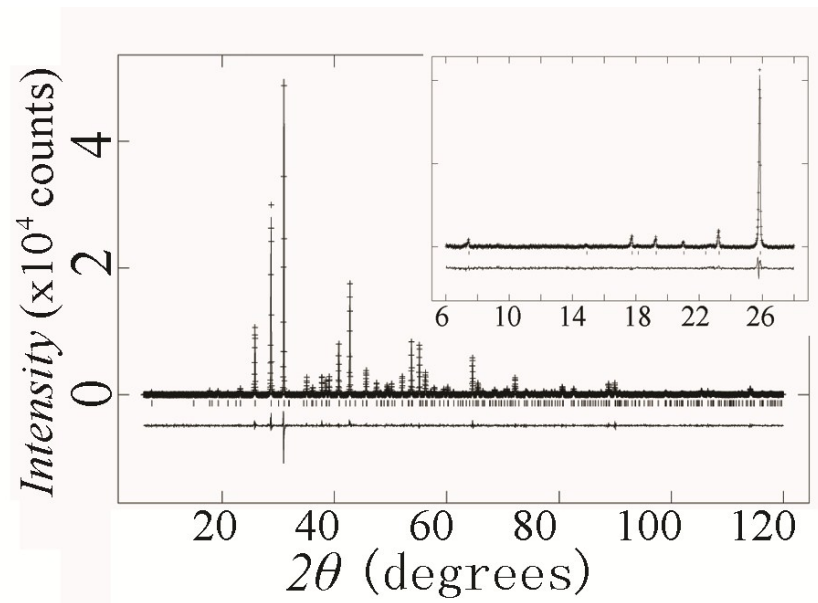

**Figure S8.** The fitted XRD plot of the  $\text{Ba}_5\text{Tm}_{0.80}\text{Mn}_{4.14}\text{O}_{15-\delta}$  sample. The inset expands the low-angle regions

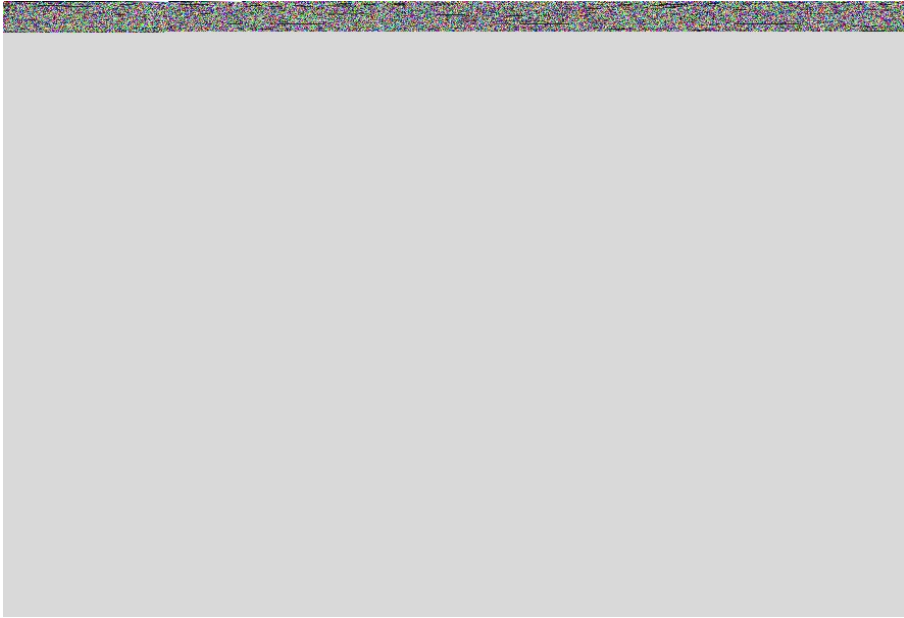

**Figure S9.** The fitted XRD plot of the  $\text{Ba}_5\text{Yb}_{0.83}\text{Mn}_{4.17}\text{O}_{15.8}$  sample. The inset expands the low-angle regions

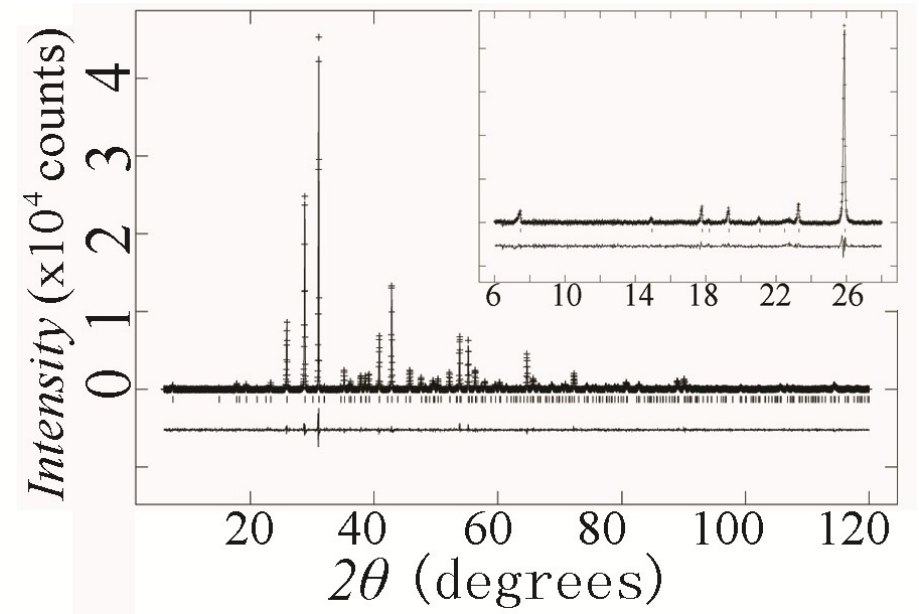

**Figure S10.** The fitted XRD plot of the  $\text{Ba}_5\text{Lu}_{0.78}\text{Mn}_{4.21}\text{O}_{15.8}$  sample. The inset expands the low-angle regions

**TABLE S1.** The structural parameters for  $Ba_5Ln_{1-x}Mn_{4+y}O_{15-\delta}$  from fits to x-ray diffraction profiles, showing lattice parameters, atomic coordinates, isotropic temperature ( $U$ ) factors for the cation sites (oxygen atom values were fixed to be 0.025 Å), and M-O and Mn-Mn distances. The structure has space group  $P6_3/mmc$ . Sites: Ba1: 2d ( $\frac{2}{3} \frac{1}{3} \frac{1}{4}$ ); Ba2: 4f ( $\frac{2}{3} \frac{1}{3} z_1$ ); Ba3: 4e (0 0  $z_2$ ); Ln: 2a(0 0  $\frac{1}{2}$ ); Mn1: 4f ( $\frac{1}{3} \frac{2}{3} z_3$ ); Mn2: 4f ( $\frac{1}{3} \frac{2}{3} z_4$ ); O1: 6h( $x_1 -x_1 \frac{1}{4}$ ); O2: 12k ( $x_2 -x_2 z_5$ ); O3: 12k ( $x_3 -x_3 z_6$ )

| <i>Ln</i> | <i>a</i> /Å | <i>c</i> /Å | <i>V</i> /Å <sup>3</sup> | <i>Ba</i> 1:    | <i>Ba</i> 2:          | <i>Ba</i> 2:      | <i>Ba</i> 3: <i>z</i> <sub>2</sub> | <i>Ba</i> 3:    | <i>Ln</i> :     | <i>Mn</i> 1:          | <i>Mn</i> 1:    | <i>Mn</i> 2:          | <i>Mn</i> 2:    | <i>O</i> 1: <i>x</i> <sub>1</sub> | <i>O</i> 2: <i>x</i> <sub>2</sub> | <i>O</i> 2: <i>z</i> <sub>5</sub> | <i>O</i> 3: <i>x</i> <sub>3</sub> | <i>O</i> 3: <i>z</i> <sub>6</sub> | <i>d</i> <sub>Ln-O</sub> | <i>d</i> <sup>[a]</sup> <sub>Mn1-O</sub> | <i>d</i> <sup>[a]</sup> <sub>Mn2-O</sub> | <i>d</i> <sub>Mn1-Mn2</sub> | <i>d</i> <sub>Mn2-Mn2</sub> |
|-----------|-------------|-------------|--------------------------|-----------------|-----------------------|-------------------|------------------------------------|-----------------|-----------------|-----------------------|-----------------|-----------------------|-----------------|-----------------------------------|-----------------------------------|-----------------------------------|-----------------------------------|-----------------------------------|--------------------------|------------------------------------------|------------------------------------------|-----------------------------|-----------------------------|
|           |             |             |                          | 100 <i>xU</i>   | <i>z</i> <sub>1</sub> | 100 <i>xU</i> ,/Å |                                    | 100 <i>xU</i>   | 100 <i>xU</i>   | <i>z</i> <sub>3</sub> | 100 <i>xU</i> , | <i>z</i> <sub>4</sub> | 100 <i>xU</i>   |                                   |                                   |                                   |                                   |                                   | / Å                      | / Å                                      | / Å                                      | / Å                         | / Å                         |
|           |             |             |                          | /Å <sup>2</sup> |                       | <sup>2</sup>      |                                    | /Å <sup>2</sup> | /Å <sup>2</sup> |                       | /Å <sup>2</sup> |                       | /Å <sup>2</sup> |                                   |                                   |                                   |                                   |                                   |                          |                                          |                                          |                             |                             |
| Sm        | 5.7978(1)   | 24.0387(4)  | 699.79(2)                | 1.0(2)          | 0.4392(1)             | 1.1(1)            | 0.3419(1)                          | 0.8(1)          | 2.1(2)          | 0.4040(3)             | 0.3(3)          | 0.2995(3)             | 2.4(3)          | 0.179(2)                          | 0.177(1)                          | 0.4445(7)                         | 0.488(1)                          | 0.3505(6)                         | 2.22(1)                  | 1.93(1)                                  | 1.97(1)                                  | 2.52(1)                     | 2.37(1)                     |
| Eu        | 5.7957(1)   | 23.9851(3)  | 697.72(2)                | 1.5(2)          | 0.4396(1)             | 1.7(1)            | 0.3422(1)                          | 1.4(1)          | 2.2 (2)         | 0.4042(3)             | 1.4(3)          | 0.2996(3)             | 2.8(3)          | 0.186(2)                          | 0.176(2)                          | 0.4456(7)                         | 0.485(1)                          | 0.3510(5)                         | 2.20(1)                  | 1.93(1)                                  | 1.93(1)                                  | 2.51(1)                     | 2.38(1)                     |
| Gd        | 5.7898(1)   | 23.9556(3)  | 695.44(1)                | 1.3(1)          | 0.4400(1)             | 1.7(1)            | 0.3423(1)                          | 1.5(1)          | 1.7(1)          | 0.4042(2)             | 1.9(2)          | 0.300 (3)             | 2.7(2)          | 0.183(2)                          | 0.175(1)                          | 0.4471(6)                         | 0.484(1)                          | 0.3511(5)                         | 2.17(1)                  | 1.93(1)                                  | 1.93(1)                                  | 2.49(1)                     | 2.41(1)                     |
| Tb        | 5.7508(1)   | 23.6530(3)  | 677.44(1)                | 1.7(1)          | 0.4417(1)             | 1.6(1)            | 0.3441(1)                          | 1.3(1)          | 2.6(1)          | 0.4060(3)             | 1.7(2)          | 0.3013(3)             | 2.2(2)          | 0.181(2)                          | 0.172(1)                          | 0.4490(6)                         | 0.484(1)                          | 0.3524(5)                         | 2.10(1)                  | 1.93(1)                                  | 1.94(1)                                  | 2.48(1)                     | 2.43(1)                     |
| Dy        | 5.7772(2)   | 23.8843(6)  | 690.36(5)                | 1.3 (1)         | 0.4408(1)             | 1.6(1)            | 0.3427(1)                          | 1.5(1)          | 2.8(1)          | 0.4044(3)             | 1.5 (3)         | 0.3003(3)             | 2.7(2)          | 0.181(2)                          | 0.177(1)                          | 0.4466(6)                         | 0.485(1)                          | 0.3512(5)                         | 2.18(1)                  | 1.92(1)                                  | 1.94(1)                                  | 2.49(1)                     | 2.40(1)                     |
| Ho        | 5.7736(1)   | 23.8554(4)  | 688.66(2)                | 1.7(2)          | 0.4417(1)             | 1.7(1)            | 0.3431(1)                          | 1.4 (1)         | 4.0(2)          | 0.4041(3)             | 0.4(2)          | 0.2993(3)             | 2.6(3)          | 0.187(2)                          | 0.175(2)                          | 0.4442(7)                         | 0.480(1)                          | 0.3502(6)                         | 2.20(1)                  | 1.90(1)                                  | 1.89(1)                                  | 2.50(1)                     | 2.35(1)                     |
| Er        | 5.7695(1)   | 23.8303(3)  | 686.96(2)                | 1.4 (1)         | 0.4415(1)             | 1.6(1)            | 0.3432(1)                          | 1.6(1)          | 2.7 (1)         | 0.4048(3)             | 1.7 (2)         | 0.3002(3)             | 2.5(2)          | 0.184(2)                          | 0.175(1)                          | 0.4473(6)                         | 0.484(1)                          | 0.3515(5)                         | 2.15(1)                  | 1.92(1)                                  | 1.93(1)                                  | 2.49(1)                     | 2.39(1)                     |
| T         | 5.7658(1)   | 23.8029(3)  | 685.31(1)                | 1.5(1)          | 0.4417(1)             | 1.7(1)            | 0.3434(1)                          | 1.6(1)          | 2.0(1)          | 0.4057(2)             | 2.2(2)          | 0.3005(3)             | 2.4(2)          | 0.184(2)                          | 0.173(1)                          | 0.4480(5)                         | 0.485(1)                          | 0.3511(5)                         | 2.13(1)                  | 1.94(1)                                  | 1.92(1)                                  | 2.50(1)                     | 2.40(1)                     |
| m         |             |             |                          |                 |                       |                   |                                    |                 |                 |                       |                 |                       |                 |                                   |                                   |                                   |                                   |                                   |                          |                                          |                                          |                             |                             |
| Yb        | 5.7639(2)   | 23.766 (1)  | 683.80(7)                | 1.0 (2)         | 0.4424(1)             | 1.3 (1)           | 0.3440(1)                          | 0.9(1)          | 1.7(2)          | 0.4054(3)             | 0.7(3)          | 0.2996(4)             | 2.5(3)          | 0.183(2)                          | 0.174(2)                          | 0.4474(9)                         | 0.488(2)                          | 0.3508(7)                         | 2.14(1)                  | 1.95(1)                                  | 1.94(1)                                  | 2.52(1)                     | 2.36(1)                     |
| Lu        | 5.7573(1)   | 23.7459(3)  | 681.63(2)                | 2.7 (1)         | 0.4423(1)             | 2.8(1)            | 0.3440(1)                          | 2.5(1)          | 2.6(1)          | 0.4062(2)             | 2.9(2)          | 0.3010(2)             | 3.3(2)          | 0.188(1)                          | 0.172(1)                          | 0.4490(4)                         | 0.485(1)                          | 0.3508(4)                         | 2.10(1)                  | 1.95(1)                                  | 1.90(1)                                  | 2.50(1)                     | 2.42(1)                     |

[a] the average bond length

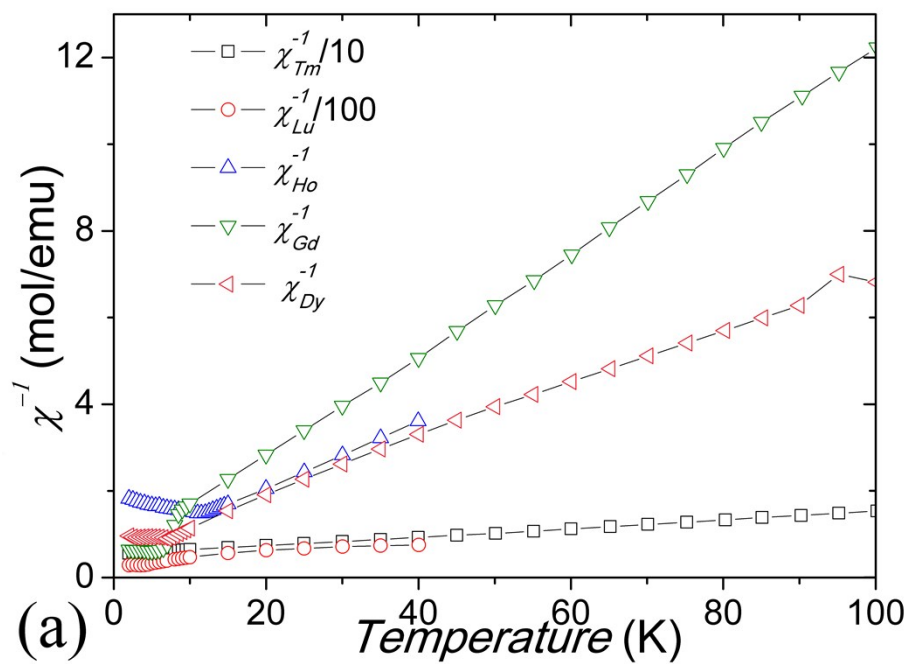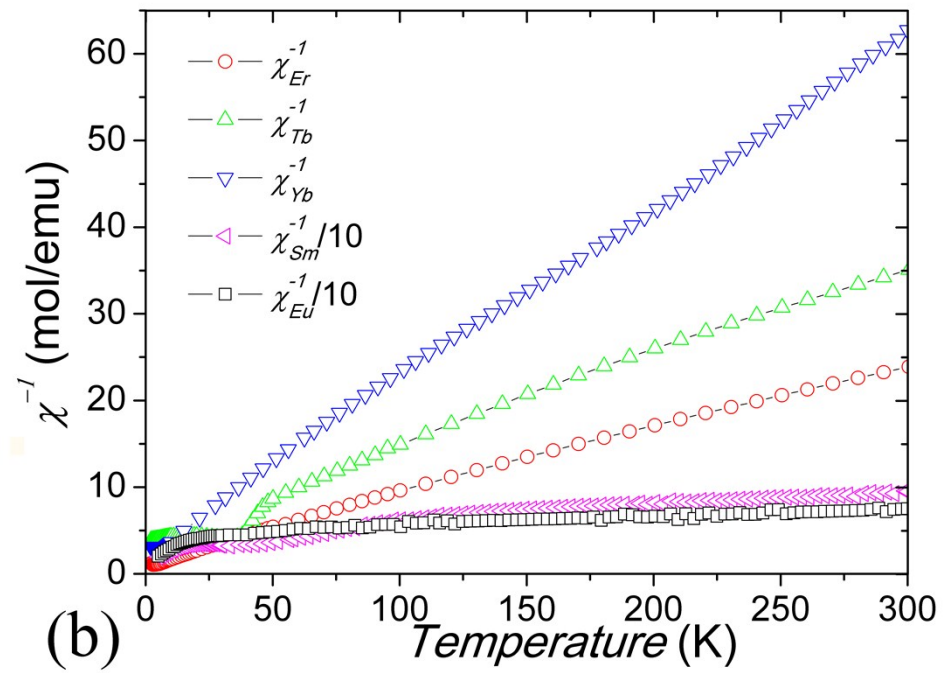

**Figure S11.** inverse susceptibility  $\chi^{-1}$  vs. temperature for  $\text{Ba}_5\text{Ln}_{1-x}\text{Mn}_{4+y}\text{O}_{15-\delta}$  (a)  $\text{Ln}=\text{Tm}, \text{Lu}, \text{Ho}, \text{Gd}$  and  $\text{Dy}$  at 20 Oe; (b)  $\text{Ln} = \text{Er}, \text{Tb}, \text{Yb}, \text{Eu}$  and  $\text{Sm}$  at 1000 Oe. For clarity,  $\chi^{-1}$  are scaled by 0.1 for the Sm, Eu and Tm samples, and by 0.01 for the Lu sample.
